# Supplementary material for: The History and Prediction of Prebiotics and Postbiotics: A Patent Analysis
Source: MDPI journal article supplement (doi:10.3390/nu16030380), 2024-01-27
Supplement: s1 [file s1]

Table S1. Information on the functional role of prebiotics

| Functionality         | Firms                                                                         | Patent Number                     | Skill                                                                                                      |
|-----------------------|-------------------------------------------------------------------------------|-----------------------------------|------------------------------------------------------------------------------------------------------------|
| Amino acid Metabolism | Sigmoid Pharma Limited                                                        | US20060018965 A1                  | Controlled Release Microcapsules                                                                           |
| Amino acid Metabolism | Hoelzel, Karl Heinz, 8081 Schoengeising, De                                   | DE4033996 A1                      | Probiotics Enzymatic Metabolites Capsules                                                                  |
| Amino acid Metabolism | Nestlé Nestec Sa                                                              | WO2010000776 A1                   | Temperature-sensitive microorganisms and their use in delivering compounds to specific regions of the body |
| Amino acid Metabolism | Jiangnan University                                                           | CN111700904 A                     | Use of acylated starch for the targeted release of short-chain fatty acids in the large intestine          |
| Amino acid Metabolism | Guangzhou University                                                          | CN104667285 B                     | Semi-trellised-polydopamine material slow-release carriers                                                 |
| Amino acid Metabolism | Pfizer Pharma Inc Corporation                                                 | US9737615 B2/<br>CN101365490 B    | Biocompatible hydrophobic core carriers                                                                    |
| Amino acid Metabolism | The Regents Of The University Of California                                   | WO2020014106 A1/<br>CN112384623 A | Protein-based micelles for delivery of hydrophobically active compounds                                    |
| Amino acid Metabolism | Massachusetts Institute Of Technology; The Brigham And Women's Hospital, Inc. | US10716751 B2/<br>CN106573999 A   | Modular design regulates residence time structure                                                          |
| Amino acid Metabolism | Japan Science And Technology Corporation                                      | WO03000285 A1                     | Tissue-specific transporter inhibitors containing supramolecularly structured polyrotaxanes                |
| Amino acid Metabolism | Intrexon Arctubio Dix Ltd. Intrexon Actobiotics N.v.                          | KR20190056387 A/<br>CN109983028A  | Microorganisms with enhanced cell adhesion properties regulate microbial gastrointestinal retention time   |
| Amino acid Metabolism | Massachusetts Institute Of Technology; The Brigham And Women's Hospital, Inc. | CN106573015 A                     | Hydroxyl-containing polymer enteric elastomer composites utilising hydrogen bonding                        |
| Amino acid Metabolism | Cell Biotech Co., Ltd.                                                        | KR20190135343 A                   | Fusion proteins that bind to targeted peptides and active ingredients                                      |

Table S1. Information on the functional role of prebiotics

| Functionality         | Firms                                                                                                          | Patent Number                | Skill                                                                                      |
|-----------------------|----------------------------------------------------------------------------------------------------------------|------------------------------|--------------------------------------------------------------------------------------------|
| Amino acid Metabolism | State Of Oregon Acting By And Through The State Board Of Higher Education On Behalf Of Oregon State University | US20040219186 A1/CN1543337 A | Gastric retention device comprising a polysaccharide mixture forming a soluble polymer gel |
| Amino acid Metabolism | Yeda Research And Development Co., Ltd.                                                                        | US20100135974 A1             | Redirected genetically engineered t-regulatory cells                                       |
| Amino acid Metabolism | Rhone-poulenc Nutrition Animale                                                                                | US4181710 A/US4181708 A      | Coating for resistance to the rumen environment                                            |
| Amino acid Metabolism | Adare Pharmaceuticals, Inc.                                                                                    | US20070196491 A1             | Controlled release dosage forms of target-delivered drugs with multiple coatings           |
| Amino acid Metabolism | Hisamitsu Pharmaceutical Co., Inc                                                                              | EP1607087 A1                 | Double-coated formulations consisting of anionic and cationic polymers                     |
| Amino acid Metabolism | Lek, Tovarna Farmaceutskih In Kemicnih Izdelkov, D. D.                                                         | SK282000 B6                  | Three-phase controlled release dosage form and its preparation method                      |
| Amino acid Metabolism | Dexcel Pharma Technologies Ltd.                                                                                | PL203733 B1/CN100548279 C    | Delayed release drug systems                                                               |
| Amino acid Metabolism | Flamme Technologies                                                                                            | JP5687185 B2                 | Dosage forms with release controlled by both time and pH                                   |
| Amino acid Metabolism | Nestlé Nestec Sa                                                                                               | CN104206946 A                | Dietary fibre, oligofructose and other formulations                                        |
| Amino acid Metabolism | Huguet Helene-celine; Andremont Antoine; Tsapis Nicolas; Fattal Elias                                          | US20120107367 A1             | Programmed delivery system to the lower part of the small intestine                        |
| Amino acid Metabolism | PLx pharmaceutical company / Plx Opco Inc. (美国德克萨斯州(TX))                                                       | US9730884 B2/CN103957888 B   | Bioactive or pH-dependent targeted delivery carriers containing free fatty acids (FFA)     |
| Amino acid Metabolism | Caledo Biotechnology Co. kaleido biosciences inc                                                               | JP2018502926 A/CN107427528 A | Glycan therapeutic agents, microbiome modifiers                                            |

Table S1. Information on the functional role of prebiotics

| Functionality         | Firms                                                                     | Patent Number    | Skill                                                                                                                                   |
|-----------------------|---------------------------------------------------------------------------|------------------|-----------------------------------------------------------------------------------------------------------------------------------------|
| Amino acid Metabolism | Aptalis Pharmatech, Inc.(Teva pharmaceutical industries ltd.)             | US20110135724 A1 | Controlled release orally disintegrating tablets                                                                                        |
| Amino acid Metabolism | Adare Pharmaceuticals, Inc.                                               | US20070190145 A1 | Controlled release dosage forms of target-delivered drugs with multiple coatings                                                        |
| Amino acid Metabolism | The Royal Institution For The Advancement Of Learning (mcgill University) | US5147641 A      | Microencapsulated dosage form containing enzymes targeting intestinal amino acids                                                       |
| Amino acid Metabolism | Golf Acquiror LLC                                                         | US20120064168 A1 | Gastric retention dosage form of gabapentin with semi-permeable membrane                                                                |
| Amino acid Metabolism | ndustry Foundation Of Chonnam National University                         | US10034903 B2    | Microbots for bacteria, microbeads                                                                                                      |
| Polyphenol            | Zhejiang Wecome Medicine Industry Co., Ltd.                               | CN110251478 A    | High temperature resistant enteric coating                                                                                              |
| Polyphenol            | 希格默伊德药业有限公司                                                               | JP2010523553 A   | Contains cyclosporine mini capsules                                                                                                     |
| Polyphenol            | Anji Pharma (us) LLC                                                      | US20120177730 A1 | chemosensory receptor ligand                                                                                                            |
| Polyphenol            | Toyo Shinyaku Co Ltd                                                      | JP2015059094 A   | Effective promotion of catechin binding to cells by increasing the expression level of the gene encoding catechin receptor protein 67LR |
| Polyphenol            | Zhong Shuguang                                                            | CN101987081 A    | controlled release formulation                                                                                                          |
| Polyphenol            | Everest Pharm. Industrial Co., Ltd.                                       | TWM601104 U      | Crystalline spherical multilayer structure                                                                                              |
| Polyphenol            | Qingdao Agricultural Unive                                                | CN105852060 B    | Starch-polyphenol composite nanoparticles                                                                                               |
| Polyphenol            | Anji Pharma (us) LLC                                                      | US20150065578 A1 | Delayed release (DR) formulations                                                                                                       |
| Polyphenol            | Hao Zhang                                                                 | US20030166508 A1 | Absorbent promoter, stabiliser, and specific capsule shells                                                                             |
| Polyphenol            | Johnson Chemical Pharmaceutical Factory Co., Ltd.                         | CN110339365 A    | drug formulation                                                                                                                        |

Table S1. Information on the functional role of prebiotics

| Functionality     | Firms                                                                                 | Patent Number                  | Skill                                                                            |
|-------------------|---------------------------------------------------------------------------------------|--------------------------------|----------------------------------------------------------------------------------|
| Purine Metabolism | Bristol-myers Squibb Co                                                               | NO330554 B1                    | Enteroprotective coating containing methacrylic acid                             |
| Purine Metabolism | Sigmoid Pharma Limited                                                                | EP2409691 A1                   | Microcapsules for delivery of cyclosporin a to the colon                         |
| Purine Metabolism | Conaris Research Institute Ag; Christian-albrechts-universit?t Zu Kiel                | WO2017182347 A1                | Bi-layer microencapsulation system for pH targeting                              |
| Purine Metabolism | Ip Science Limited (Cambridge, England)                                               | UA115121 C2/ CN107028936A      | Increased bioavailability of cargo molecules through carotenoid particle loading |
| Purine Metabolism | Alza Corporation                                                                      | JP2006507309 A                 | Emulsified nanosuspension formulations                                           |
| Purine Metabolism | Bell Juk Kuang                                                                        | CN101987081 B                  | Controlled release dosage forms based on polymer coating film positioning        |
| Purine Metabolism | Deloitte Pharmaceuticals Ltd. Tillotts Pharma Ag                                      | CU24302 B1/ CN104271113 A      | Bilayer pH III polymeric material coated formulations                            |
| Purine Metabolism | CG Association/Sparks USA (NV, Washoe County)                                         | MXPA01010918 A                 | Compositions for delivering hexadecyl myristate to the gut                       |
| Purine Metabolism | GHOSH PRASANTA KUMAR , GUPTA VIPIN BIHARI , RATHORE MAHENDRA SINGH , GONDALIYA BHAVIK | IN2009MU02548 A                | Biodegradable polymer formulations for drug delivery to the colon                |
| Purine Metabolism | Berkemeyer, USA Birkmayer U.s.a.                                                      | AU674583 B2                    | NADH pills with acid-stable protective coating                                   |
| Purine Metabolism | Kibo Biotech                                                                          | KR20040029995 A/ CN100337549 C | formulas                                                                         |
| Purine Metabolism | Conaris Research Institute Ag                                                         | KR20160088436 A                | Pharmaceutical formulations containing 5-aminosalicylic acid and nicotinamide    |
| Purine Metabolism | Schering-Plough Health Care Products, Inc.                                            | TW200815050 A                  | Phenylephrine intestinal target delivery formulations                            |

Table S1. Information on the functional role of prebiotics

| Functionality    | Firms                                                                                                                                | Patent Number    | Skill                                                                                            |
|------------------|--------------------------------------------------------------------------------------------------------------------------------------|------------------|--------------------------------------------------------------------------------------------------|
| Other Metabolism | Hunan Jingtian Technology Industry Co.                                                                                               | CN106173265 A    | Enteric coated formic acid                                                                       |
| Other Metabolism | Hunan Jingtian Technology Industry Co.                                                                                               | CN106107055 A    | Enteric coated butyric acid preparation                                                          |
| Other Metabolism | Aizawa Seiki Co.                                                                                                                     | CN1972698 B      | formulas                                                                                         |
| Other Prebiotics | Miller Guy W.                                                                                                                        | US20040091537 A1 | Fructose-based coating formulations for indigestible carbohydrates                               |
| Other Prebiotics | British Sugar Plc                                                                                                                    | GB2367002 A      | Coating formulations containing water-insoluble film-forming polymer matrices and dietary fibres |
| Other Prebiotics | Alpiflor S.r.l.                                                                                                                      | EP2289505 B1     | Probiotic carrier formulation with probiotics and butyric acid compounds                         |
| Other Prebiotics | Funda, Elger;Krainz, Odile;Steinert, Robert                                                                                          | JP2021501565 A   | Multi-particle delivery system with inner and outer coating                                      |
| Other Prebiotics | University Of Southern California                                                                                                    | US10631564 B2    | Multi-layer particulate dosage form containing alginate, starch acetate and protein              |
| Other Prebiotics | Mcgill University                                                                                                                    | WO2007140613 A1  | Microencapsulated formulations of milk carriers containing bacteria and fermentation             |
| Other Prebiotics | Anhui Zhengdayuan Feed Co., Ltd.                                                                                                     | CN103005157 B    | Microencapsulated formula with probiotics and prebiotics                                         |
| Other Prebiotics | Ausa Pharmed Ltd.; Folate (shenzhen) Precision Nutrition Food Group Co., Ltd.; Shenzhen Changqing Medical Science Research Institute | CN112168802 A    | Enteric capsules based on tamarind gum                                                           |
| Other Prebiotics | Commonwealth Scientific & Industrial Research Organisation                                                                           | JP6033998 B2     | Microencapsulated dosage forms containing film-forming proteins and carbohydrates                |

Table S1. Information on the functional role of prebiotics

| Functionality    | Firms                                            | Patent Number      | Skill                                                                                            |
|------------------|--------------------------------------------------|--------------------|--------------------------------------------------------------------------------------------------|
| Other Prebiotics | Inner Mongolia Agricultural University           | CN105105144 B      | Preparation of probiotic microcapsules containing rennet enzyme                                  |
| Other Prebiotics | Jinling Institute Of Technology                  | CN104435283 B      | Preparation of microcapsules containing sodium alginate with protein wall materials              |
| Other Prebiotics | Universidade Federal De Pelotas                  | BR1020180687 23 A2 | Microcapsules containing xanthan gum                                                             |
| Other Prebiotics | University Of Saskatchewan                       | WO201501930 7 A1   | Microcapsules containing biopolymers, plant proteins                                             |
| Other Prebiotics | Shaoxing Tongchuang Biotechnology Co., Ltd.      | CN109700781 A      | Stable microspheres formed by liquid spraying and cross-linking with divalent calcium metal ions |
| Other Prebiotics | Fundacion Leia, C.d.t.                           | ES2350436 B1       | microencapsulated symbiotic material                                                             |
| Other Prebiotics | Chengdu New Keli Chemical Technology Co., Ltd.   | CN108936680 A      | Web Microspherical Gluten Probiotic Capsules                                                     |
| Other Prebiotics | Beland, Genevieve; Barbeau, Julie; Fliss, Ismail | CA2657291 A1       | Beneficial biomass carriers based on maple extracts                                              |
| Other Prebiotics | Biomatrix, Inc                                   | WO02085415 A1      | Fructose-based icing formulations                                                                |
| Other Prebiotics | Ewos Innovation As                               | NO20150715 A1      | Delivery system containing ethylenediammonium alginate                                           |
| Other Prebiotics | Mogon Pharmaceuticals Sagl                       | RU2692473 C1       | Slow release compositions with hydroxypropyl methyl cellulose matrix embedded in curcumin        |
| Other Prebiotics | Northeast Agricultural University                | CN104543611 A      | Microencapsulated Dosage Forms Containing Oligosaccharides Melade Products                       |
| Other Prebiotics | Zhejiang University Of Technology                | CN110547468 A      | Probiotic microcapsules containing edible mushroom oligosaccharides                              |
| Other Prebiotics | Cj Cheiljedang Corporation                       | KR201700728 25 A   | Alginate-calcium beads coated with lactic acid bacteria                                          |
| Other Prebiotics | The University Of Hull                           | CN101917979 B      | Protective preparations for the outer shell of naturally occurring spores                        |
| Other Prebiotics | Beijing Technology And Business University       | CN110251474 A      | Starch-based colon-targeted bi-layer probiotic tablets                                           |

Table S1. Information on the functional role of prebiotics

| Functionality    | Firms                                                                                               | Patent Number     | Skill                                                                                        |
|------------------|-----------------------------------------------------------------------------------------------------|-------------------|----------------------------------------------------------------------------------------------|
| Other Prebiotics | Dsm Ip Assets B.v.                                                                                  | WO2020043749 A1   | Enzyme Delivery Systems                                                                      |
| Other Prebiotics | Socit Des Produits Nestl S.a.                                                                       | US7101565 B2      | Mucopolysaccharide prebiotic compositions formulation                                        |
| Other Prebiotics | Metamodix, Inc.                                                                                     | US10159699 B2     | Systems affecting the intestinal microflora                                                  |
| Other Prebiotics | Takaki Yasumura;Hidesaku Yamamoto;Natsuki Morishita                                                 | JP2005526861 A    | Methods for controlling the rate of methane manipulation for gastrointestinal transport      |
| Other Prebiotics | Glycologic Limited                                                                                  | AU2006340298 A1   | Starch-based gastric floatation compositions                                                 |
| Other Prebiotics | Kabadi, Mohan; Schentag, Jerome, J.                                                                 | WO2014152338 A1   | A microencapsulated live probiotic-targeted delivery system with a two-stage release pattern |
| Other Prebiotics | Only Co., Ltd., Shanghai Jiantong Univ.                                                             | CN109464425 A     | Triple probiotic encapsulated pellets                                                        |
| Other Prebiotics | Purdue Research Foundation                                                                          | US20140179629 A1  | Starch-containing cross-linked polymer particles                                             |
| Other Prebiotics | Shandong Tanke Biological Technology Co., Ltd.                                                      | CN109674061 A     | Stabilised double-layer microencapsulation with sodium alginate and poly-L-arginine          |
| Other Prebiotics | Therabiome LLC; Schentag Jerome J.                                                                  | IN2015DN07705 A   | Targeted gastrointestinal delivery                                                           |
| Other Prebiotics | Yoshiyuki Inaba; Toshifumi Ogun; Akihiko Eguchi; Kazuhiko Naito                                     | JP2016517425 A    | Capsule Encapsulated Targeted Delivery System                                                |
| Other Prebiotics | Sato, Tsuyoshi; Sakata, Keiji; Yamazaki, Hiroshi; Tanaka, Mitsuo; Yano, Masaki                      | JP2011524890 A    | Multi-layer, multi-site drug delivery dosage forms                                           |
| Other Prebiotics | Centro Nacional De Tecnolog?a Y Seguridad Alimentaria, Laboratorio Del Ebro; Universidad De Navarra | BR112015000041 A2 | Micronised formula with casein and chitosan and prebiotics                                   |
| Other Prebiotics | Evonik Operations Gmbh                                                                              | EP3646857 A1      | Colonic Delivery Capsule Formulation                                                         |

Table S1. Information on the functional role of prebiotics

| Functionality             | Firms                                                                      | Patent Number    | Skill                                                                                              |
|---------------------------|----------------------------------------------------------------------------|------------------|----------------------------------------------------------------------------------------------------|
| Other Prebiotics          | Iker, Brandon C;Hillebrand, Greg;                                          | JP2020504159 A   | Compositions containing resistant starch and polysaccharides                                       |
| Other Prebiotics          | Ocean University Of China                                                  | CN111820419 A    | Prebiotic formulation based on galactomannan and fucoidan complexes                                |
| Other Prebiotics          | Ohio State Innovation Foundation                                           | US20180000878 A1 | Microspheres containing biofilm-producing probiotics, prebiotics or prebiotic membranes            |
| Other Prebiotics          | Saito Ryoza                                                                | JP2016029065 A   | Formulation with probiotic generators                                                              |
| Other Prebiotics          | Zhejiang Huakang Pharmaceutical Co., Ltd.                                  | CN109497555 A    | Microcapsules containing acacia sugar, pH-triggered materials and colony-triggered materials       |
| Pentacyclic Triterpenoids | Benzon Pharma A/s Te Hvidovre, Denemarken                                  | EP0080341 A2     | Corrosive coating resistant to gastric fluids                                                      |
| Pentacyclic Triterpenoids | Perry Bruce                                                                | US20190008780 A1 | Dual-action delivery of hepatic supplements to the small intestine by exocapsules and endocapsules |
| Fatty acid Metabolism     | Shanghai Institute of Pharmaceutical Sciences, Chinese Academy of Sciences | CN108653234 B    | Dual enteric granule formulations containing protease preparations                                 |
| Fatty acid Metabolism     | Sigmoid Pharmaceuticals Ltd. ( Sigmoid Pharma Limited)                     | CN107106644 A    | Polymer-coated formulations containing hydrogels                                                   |
| Fatty acid Metabolism     | Sigmoid Pharmaceuticals Ltd. ( Sigmoid Pharma Limited)                     | CA2683415 C      | Microcapsules of mixed shell/core suspension                                                       |
| Fatty acid Metabolism     | Hewili Glaxo Group Limited                                                 | WO2007012478 A2  | Enteric microcapsules                                                                              |
| Fatty acid Metabolism     | Hewili Glaxo Group Limited                                                 | WO2005070401 A1  | Enteric soluble microcapsules containing lipid-holding carriers                                    |
| Fatty acid Metabolism     | Biolek Sp. Z O.o.                                                          | EP2597972 A1     | Formulated with probiotics and short-chain fatty acids                                             |



Table S1. Information on the functional role of prebiotics

| Functionality         | Firms                                                                        | Patent Number      | Skill                                                                                                             |
|-----------------------|------------------------------------------------------------------------------|--------------------|-------------------------------------------------------------------------------------------------------------------|
| Fatty acid Metabolism | Farmacia, Sweden<br>Pharmacia & Upjohn<br>Ab                                 | JPH08507515 A      | Delivery system for isometric shaped colloidal solid lipid particles                                              |
| Fatty acid Metabolism | DSM Intellectual<br>Property Assets Ltd.<br>(Dsm Ip Assets B.v.)             | JP2021501565 A     | Double Coated Nutrient Delivery Systems                                                                           |
| Fatty acid Metabolism | DSM Intellectual<br>Property Assets Ltd.<br>(Dsm Ip Assets B.v.)             | WO2020043749<br>A1 | Two-tier delivery system                                                                                          |
| Fatty acid Metabolism | Hubei Huayang<br>Technology<br>Development Co.                               | CN106490345 A      | Preparation of acidifying agents for lipid-containing and short-chain fatty acid-containing envelope layers       |
| Fatty acid Metabolism | Nestlé Products<br>Technical Assistance<br>Ltd.                              | CN102595934 A      | formulas                                                                                                          |
| Fatty acid Metabolism | Nestlé Products<br>Technical Assistance<br>Ltd.                              | RU2008116057<br>A  | Dietary fibre preparations and methods of administration                                                          |
| Fatty acid Metabolism | The University Of New<br>South Wales ; Corn<br>Products Development,<br>Inc. | US6348452 B1       | Formulated with resistant starch and probiotics                                                                   |
| Fatty acid Metabolism | Vedanta Biosciences,<br>Inc.                                                 | US9764019 B2       | Formulated with small molecules and bacterial antigens                                                            |
| Fatty acid Metabolism | Ocean University of<br>China                                                 | CN111820419 A      | Formulation for the targeted regulation of Eckermannia intestinalis and short-chain fatty acid-producing bacteria |
| Fatty acid Metabolism | Finch Therapeutics<br>Holdings LLC                                           | WO2021016083<br>A1 | Compositions for the protection of the GI microbiome of the gastrointestinal tract                                |
